# Supplementary material
Source: Springer Nature journal article supplement (https://www.springermedizin.de/resource/supplementary/13075_2012_3622_MOESM3_ESM.pdf/9694952)

**A**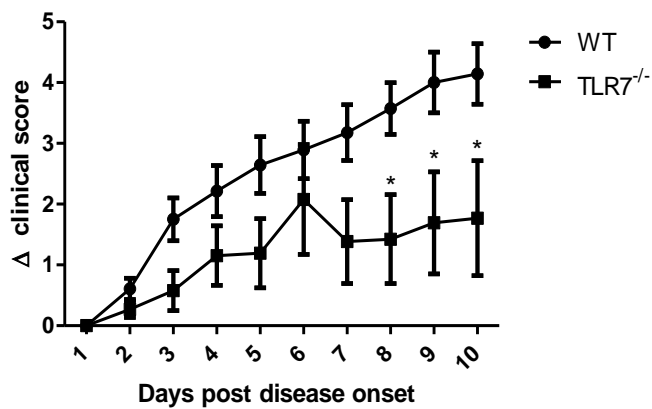**B**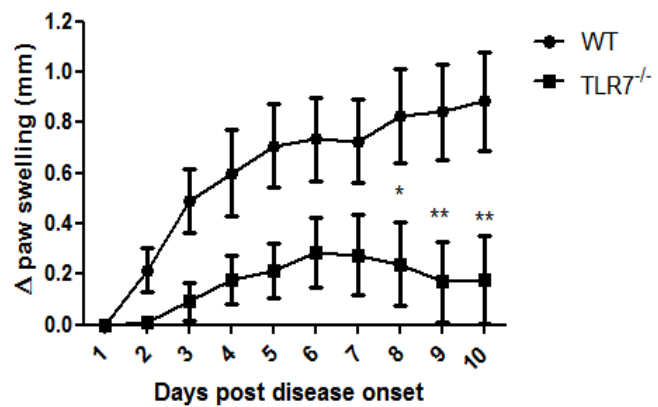**C**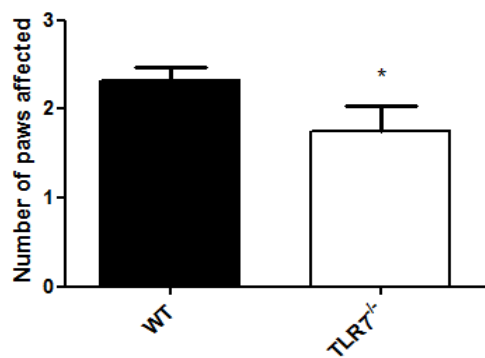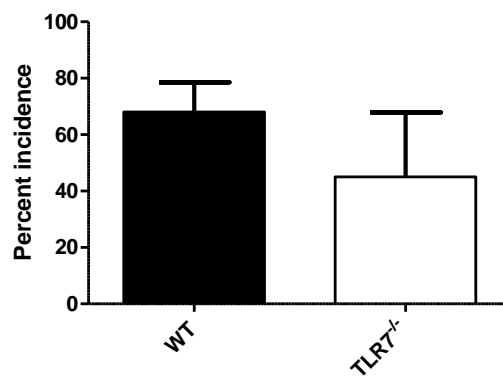**D**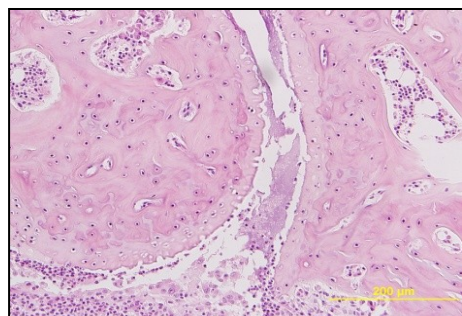

WT

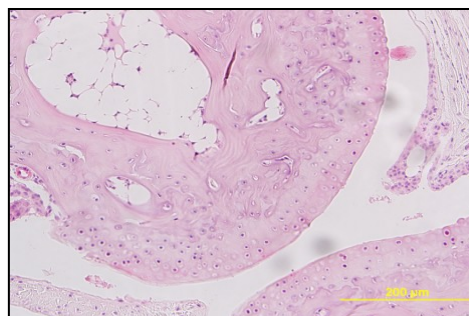TLR7<sup>-/-</sup>**E**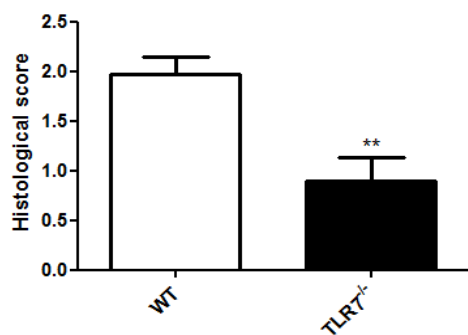

Supplement: MOESM3 [file 9694952]
